# Supplementary material
Source: publisher figshare collection journal article supplement (https://tandf.figshare.com/ndownloader/files/17469851)
Supplement: Supplementary file 1 [file 17469851]

**Appendix**

**Question Wording**

*Dirty Dozen Machiavellianism Scale (4 items)*

1. I tend to manipulate others to get my way
2. I have used deceit or lied to get my way
3. I have used flattery to get my way
4. I tend to exploit others towards my own end

*Dirty Dozen Narcissism Scale (4 items)*

1. I tend to want others to admire me
2. I tend to want others to pay attention to me
3. I tend to expect special favors from others
4. I tend to seek prestige or status

*Dirty Dozen Psychopathy Scale (4 items)*

1. I tend to lack remorse
2. I tend to be unconcerned with the morality of my actions
3. I tend to be callous or insensitive
4. I tend to be cynical

| Strongly Disagree |  |  |  |  |  |  |  |  | Strongly Agree |
| --- | --- | --- | --- | --- | --- | --- | --- | --- | --- |
| 0 | 1 | 2 | 3 | 4 | 5 | 6 | 7 | 8 | 9 |

*Political Ambition Measures (Table 2)*

Have you ever thought that, at some point in the future, you might want to run for political office? [reverse-coded for analysis]

1. Thought about it many times
2. Has crossed my mind
3. Never thought about it

Overall, how qualified do you feel you are to run for public office? [very qualified and qualified categories collapsed due to thin cells; reverse-coded for analysis]

1. Very qualified
2. Qualified
3. Somewhat qualified
4. Not at all qualified

*Campaign Aspect Items (Table 3)*

If you were to become a candidate for public office, how would you feel about engaging in the following aspects of a campaign? [reverse-coded for analysis]

1. Attending fundraising functions
2. Dealing with party officials
3. Going door-to-door to meet constituents
4. Dealing with members of the press
5. The amount of time it takes to run for office

| Very positive | Positive | Neutral | Negative | So negative it would deter me from running |
| --- | --- | --- | --- | --- |
| 1 | 2 | 3 | 4 | 5 |

*Electoral Certainty Items (Table 4)*

If you were to become a candidate for public office, how likely do you think it is that you would win your first campaign? [reverse-coded for analysis]

1. Very likely
2. Likely
3. Unlikely
4. Very unlikely

What best describes your attitudes toward running for office in the future? [reverse-coded for analysis]

1. It is something that I definitely would like to undertake in the future.
2. It is something that I might undertake if the opportunity presented itself.
3. I would not rule it out forever, but I currently have no interest.
4. It is something I would absolutely never do.
